# Supplementary material for: Whole‐exome sequencing of breast cancer, malignant peripheral nerve sheath tumor and neurofibroma from a patient with neurofibromatosis type 1
Source: PubMed Central journal article supplement (PMC5123784; doi:10.1002/cam4.551), 2015-10-03

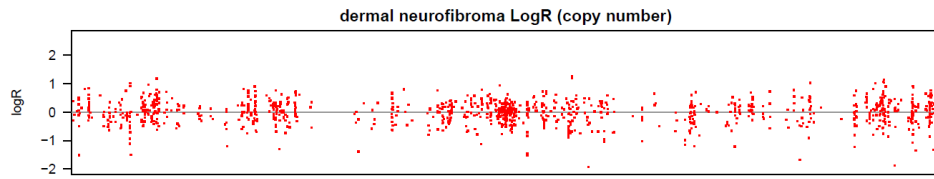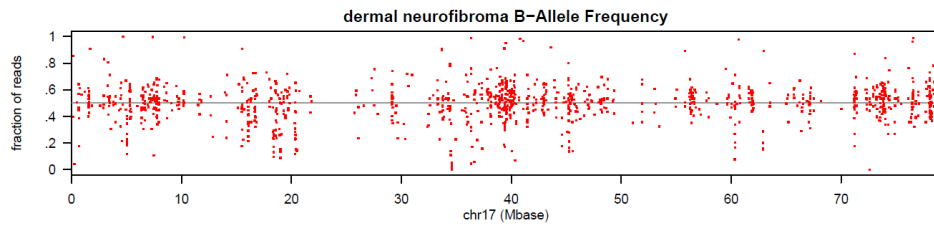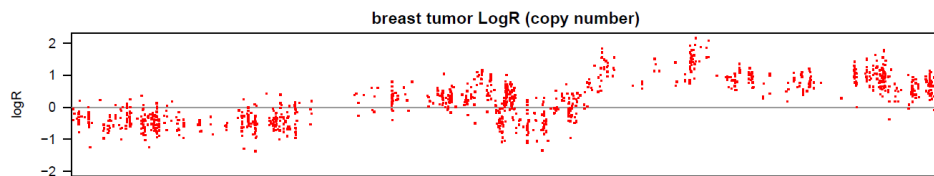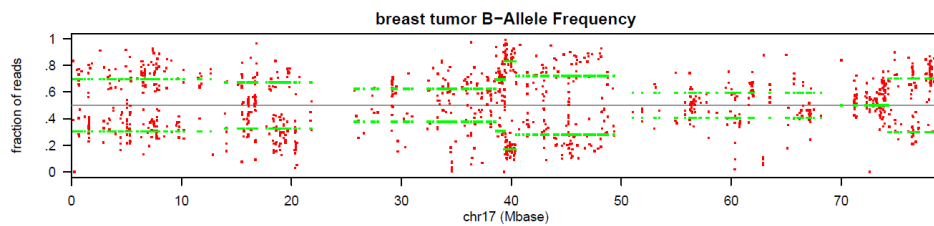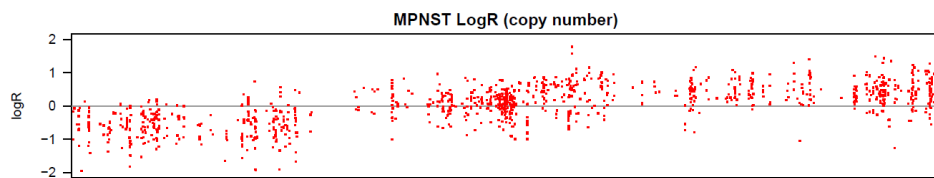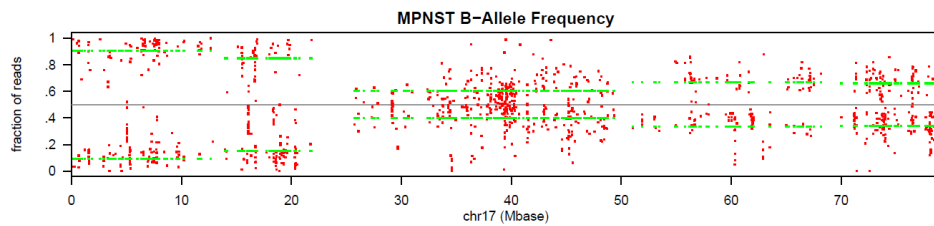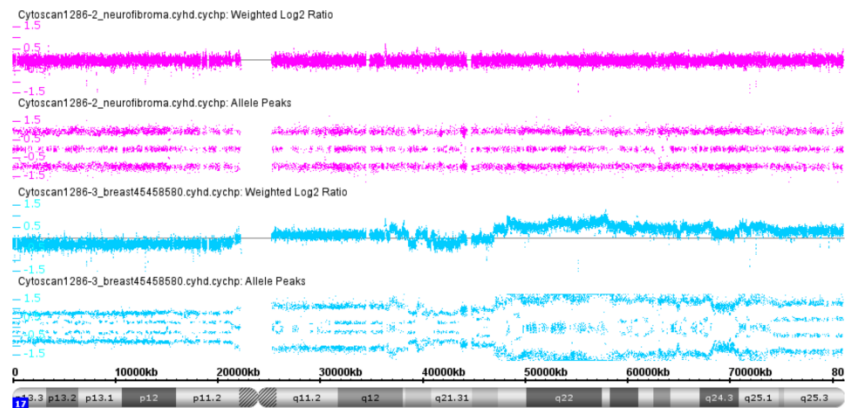

Supplement: CAM4-4-1871-s003.pdf [file CAM4-4-1871-s003.pdf]
